# Supplementary material
Source: HighWire-hosted journal article supplement (https://cmaj.ca/highwire/filestream/150661/field_highwire_adjunct_files/3/231419-res-4-at.pdf)
Supplement: 231419-res-4-at.pdf [file 231419-res-4-at.pdf]

**Appendix IV:** Definitions used to identify history of substance use toxicity, infective endocarditis, hepatitis C, HIV and sudden deaths in administrative databases

**Other substance harms (1+ hospitalization or ED visit within three-year lookback window):**

| Substance harm                             | Data sources and codes                                                                                                                                                                                                                                                           | Data source details                                                                                                                                                                                                                                                                           |
|--------------------------------------------|----------------------------------------------------------------------------------------------------------------------------------------------------------------------------------------------------------------------------------------------------------------------------------|-----------------------------------------------------------------------------------------------------------------------------------------------------------------------------------------------------------------------------------------------------------------------------------------------|
| Benzodiazepine poisoning                   | DAD, NACRS<br>ICD-10: T42.4                                                                                                                                                                                                                                                      | DAD: source = inpatient, refdate = admdate, inclsuspect = F, dxtype = alldx, acute = T<br><br>NACRS: source = ed, dedup = T, inclsuspect = F, inclscheduled = F, inclfrom_typee= T, inclto_typeip = T, inclnotseen = T, dxtype = alldx                                                        |
| Stimulant use disorder and poisoning       | DAD, NACRS<br>ICD-10 codes: F14.0, F15, T43.6, T40.5                                                                                                                                                                                                                             | DAD (%getdadsds): source = inpatient, refdate = ddate, inclsuspect = F, dxtype = alldx, acute = T<br><br>NACRS (%getnacrs): source = ed, dedup = T, inclsuspect = F, inclscheduled = F, inclfrom_typee= T, inclto_typeip = T, inclnotseen = T, dxtype = alldx                                 |
| Infective Endocarditis <sup>A</sup>        | DAD, NACRS<br>ICD-10: I38, I39.8, I33.9, I33.0, B37.6                                                                                                                                                                                                                            |                                                                                                                                                                                                                                                                                               |
| Harms associated with alcohol <sup>B</sup> | DAD, NACRS, OHIP<br>OHIP: 291 and 303<br>DAD, NACRS:<br>F10.0, F10.1, F10.2, F10.3, F10.4, F10.5, F10.6, F10.7, F10.8, F10.9, K70.0, K70.1, K70.2, K70.3, K70.4, K70.9, K29.2, X45, Y15, X65, G31.2, G62.1, G72.1, I42.6, K85.2, K86.0, E24.4, T51.0, T51.9, R78.0, Q86.0, P04.3 | OHIP: refdate=SERVDATE, FEPCODE (see 291 & 303)<br><br>DAD: source = inpatient, refdate = admdate, inclsuspect = F, dxtype = alldx, acute = T<br><br>NACRS: source = ed, dedup = T, inclsuspect = F, inclscheduled = F, inclfrom_typee= T, inclto_typeip = T, inclnotseen = T, dxtype = alldx |

Legend: ICD-10 = International Disease Classification (ICD)-10 diagnosis codes, DAD = Discharge Abstract Database, NACRS = National Ambulatory Care Reporting System, OHIP = Ontario Health Insurance Plan

**Reference:**

A: Weir MA, Slater J, Jandoc R, Koivu S, Garg AX, Silverman M. The risk of infective endocarditis among people who inject drugs: a retrospective, population-based time series analysis. *CMAJ*. 2019 Jan 28;191(4):E93-9.

B: Myran, D. T., Hsu, A. T., Smith, G., & Tanuseputro, P. (2019). Rates of emergency department visits attributable to alcohol use in Ontario from 2003 to 2016: a retrospective population-level study. *Cmaj*, 191(29), E804-E810.

### **Definition for Hepatitis C**

One or more of the following within a five-year lookback:

- 1) CIHI-DAD with the following diagnosis codes:  
     \$DAD\_DX10CODE 1-10: B171, B182, B19.2, B192
- 2) NACRS discharge record with the following diagnosis codes:  
     \$.NACRS\_DX10CODE 1-10: B171, B182, B19.2, B192
- 3) Hepatitis C treatment drug claims from the Ontario Drug Benefits (ODB) claim database:

| <b>DIN</b> | <b>Drug name</b>                                  | <b>Subclass</b>  | <b>Strength</b>        |
|------------|---------------------------------------------------|------------------|------------------------|
| 02370816   | BOCEPREVIR                                        | ANTIVIRAL AGENTS | 200MG                  |
| 02371448   | BOCEPREVIR & PEGINTERFERON ALFA 2B & RIBAVIRIN    | ANTIVIRAL AGENTS | 200MG/80MCG            |
| 02371456   | BOCEPREVIR & PEGINTERFERON ALFA 2B & RIBAVIRIN    | ANTIVIRAL AGENTS | 200MG/100MCG           |
| 02371464   | BOCEPREVIR & PEGINTERFERON ALFA 2B & RIBAVIRIN    | ANTIVIRAL AGENTS | 200MG/120MCG           |
| 02371472   | BOCEPREVIR & PEGINTERFERON ALFA 2B & RIBAVIRIN    | ANTIVIRAL AGENTS | 200MG/150MCG           |
| 09857396   | BOCEPREVIR & PEGINTERFERON ALFA 2B & RIBAVIRIN    | ANTIVIRAL AGENTS | 200MG/150MCG           |
| 02444755   | DACLATASVIR HCL                                   | ANTIVIRAL AGENTS | 60MG                   |
| 02444747   | DACLATASVIR HCL                                   | ANTIVIRAL AGENTS | 30MG                   |
| 02436027   | DASABUVIR & OMBITASVIR & PARITAPREVIR & RITONAVIR | ANTIVIRAL AGENTS | 250MG/75MG/50MG/12.5MG |
| 02451131   | ELBASVIR & GRAZOPREVIR                            | ANTIVIRAL AGENTS | 100MG/50MG             |
| 02432226   | LEDIPASVIR & SOFOSBUVIR                           | ANTIVIRAL AGENTS | 400MG/90MG             |
| 09854791   | PEGINTERFERON ALFA-2B & RIBAVIRIN                 | ANTIVIRAL AGENTS | 150MCG/0.5ML & 200MG   |
| 02416441   | SIMEPREVIR SODIUM                                 | ANTIVIRAL AGENTS | 150MG                  |
| 02418355   | SOFOSBUVIR                                        | ANTIVIRAL AGENTS | 400MG                  |
| 02456370   | SOFOSBUVIR & VELPATASVIR                          | ANTIVIRAL AGENTS | 400MG/100MG            |
| 02467542   | SOFOSBUVIR & VELPATASVIR & VOXILAPREVIR           | ANTIVIRAL AGENTS | 400MG/100MG/100MG      |

|          |                               |                  |       |
|----------|-------------------------------|------------------|-------|
| 02371553 | TELAPREVIR                    | ANTIVIRAL AGENTS | 375MG |
| 02452294 |                               | ANTIVIRAL AGENTS | 100MG |
| 02467550 | GLECAPREVIR &<br>PIBRENTASVIR | ANTIVIRAL AGENTS | 200MG |

**Definition for HIV**

- 3 OHIP physician claims in 3 years with a diagnosis code of "042", "043", or "044"
- If a person has a previous hospitalization in CIHI-DAD or OHIP claim with an HIV code (ICD-9: "042", "043", "044", ICD-10: "B24", OHIP dx code: "042", "043", "044") that occurs prior to the first physician claim, then that hospitalization or OHIP date is used as the incidence/diagnosis date.

**Definition for sudden death**

The first three characters of the ICD-10 code for underlying cause of death in ORGD database is one of the following: E89, R95-R97, S00-S99, T00-T98, V01-V99, W00-W46, W49, W59-W60, W64-W70, W73-W81, W83-W94, W99, X00-X54, X57-X99, Y00-Y36
